# Supplementary material for: Diversity of Mixotrophic Neutrophilic Thiosulfate- and Iron-Oxidizing Bacteria from Deep-Sea Hydrothermal Vents
Source: MDPI journal article supplement (doi:10.3390/microorganisms11010100), 2022-12-30
Supplement: s1 [file s1]

Article

# Diversity of Mixotrophic Neutrophilic Thiosulfate- and Iron-Oxidizing Bacteria from Deep-Sea Hydrothermal Vents

Yang He, Xiang Zeng \*, Fei Xu and Zongze Shao \*

Key Laboratory of Marine Biogenetic Resources, Third Institute of Oceanography, Ministry of Natural Resources, Xiamen 361005, China

\* Correspondence: zengxiang@tio.org.cn (X.Z.); shaozz@163.com (Z.S.)

## Supplementary Material

### Supplementary Figures

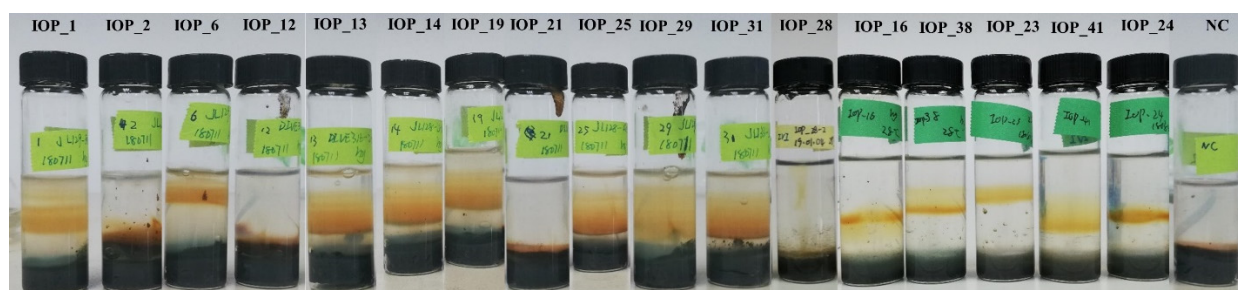

**Figure S1.** Gradient tube (ZVI-based) growth of isolates with iron-oxidizing ability.

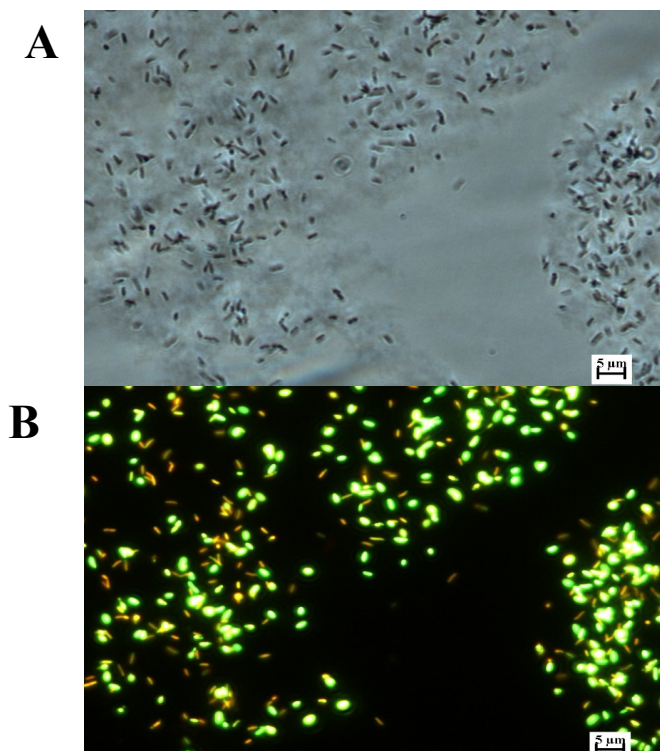

**Figure S2.** Microscopic photo of strain *Pseudomonas* sp. IOP\_13 from the Iron-Oxides layer in the gradient tube. (A) bacterial cells under light microscopy; (B) Live cells are green stained, and dead cells are red stained by LIVE/DEAD™ BacLight™ Bacterial Viability Kit, which contained SYTO 9 and propidium iodide.

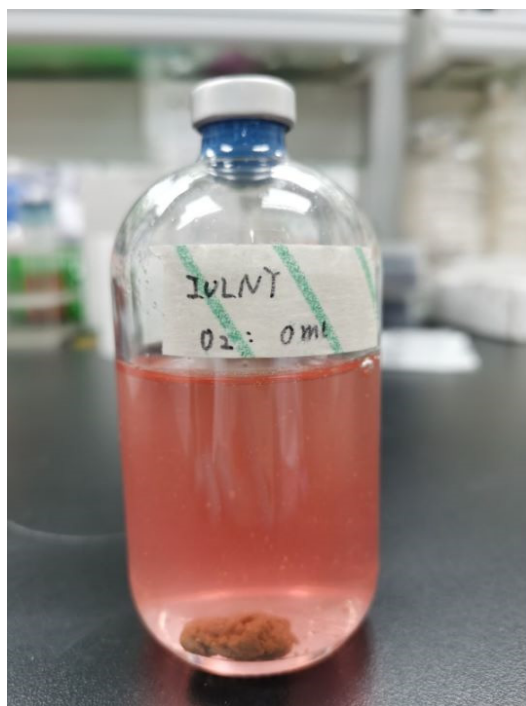

**Figure S3.** Orange-coloured trivalent iron precipitate after 10 days growth for strain *Pseudomonas* sp. IOP\_13 in nitrate reduction-iron oxidation medium.

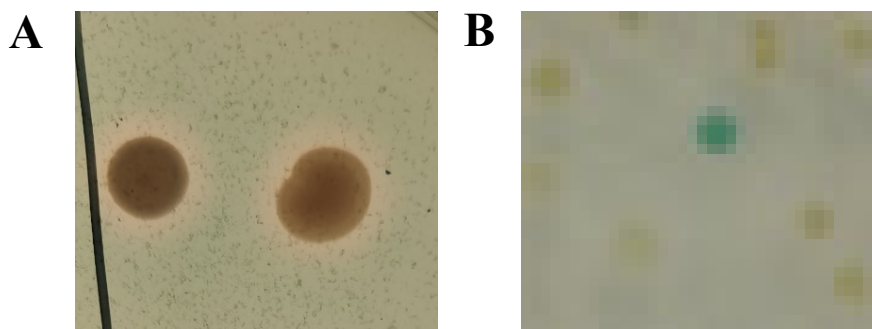

**Figure S4.** Colonies of strain *Pseudomonas* sp. IOP\_13 growing on solid test media. (A) Orange halos around the colonies of strain IOP\_13 on CAS agar plates. (B) Detection of manganese accumulation by strain *Pseudomonas* sp. IOP\_13 using leucoberblin blue (LBB) spot test.

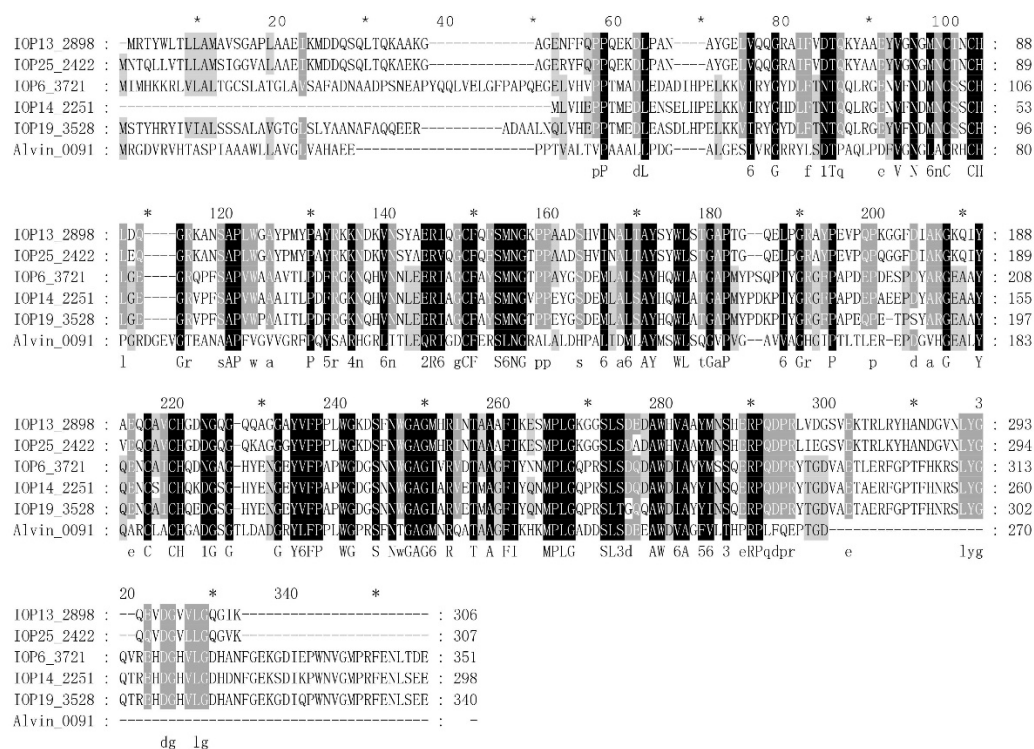

**Figure S5.** Sequence alignment of TsdA proteins. Species: IOP\_13 (IOP13\_2898), IOP\_14 (IOP14\_2251), IOP\_6 (IOP6\_3721), IOP\_25 (IOP25\_2422), IOP\_19 (IOP19\_3528), *Allochrochromatium vinosum* DSM 180<sup>T</sup> (Alvin\_0091, accession: ADC61061).

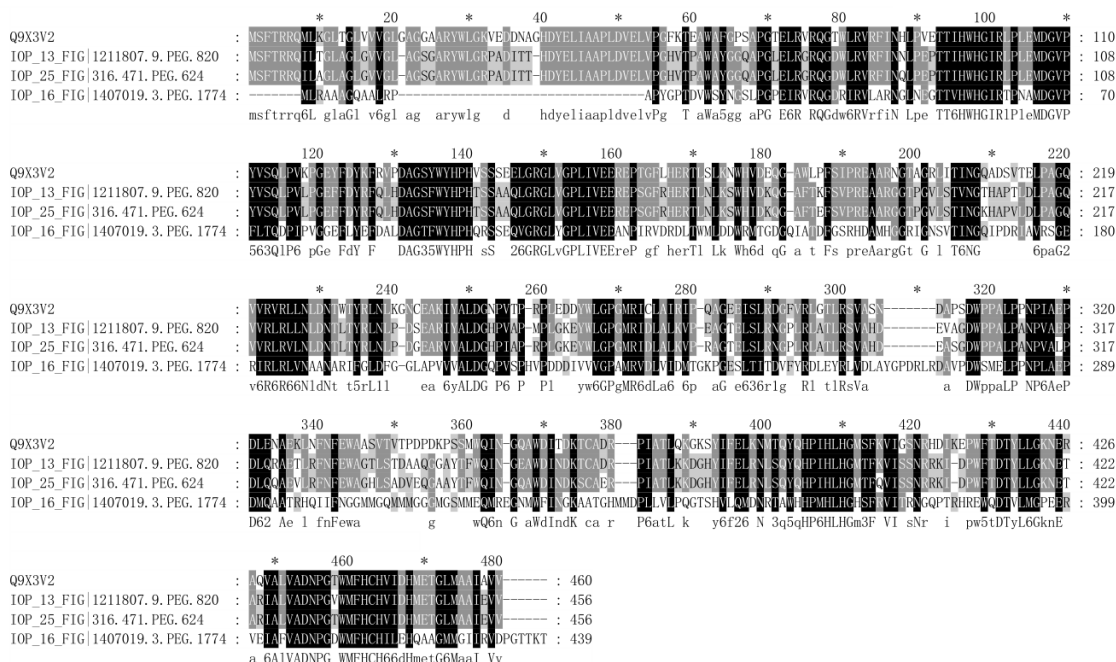

**Figure S6.** Sequence alignment of CumA proteins in the isolates and CumA identified from *Pseudomonas putida* GB-1. Species: *Pseudomonas putida* GB-1 (accession: Q9X3V2), IOP\_13 (IOP13\_820), IOP\_25 (IOP25\_624), IOP\_16 (IOP16\_1774).. Strictly conserved residues are marked with black background.

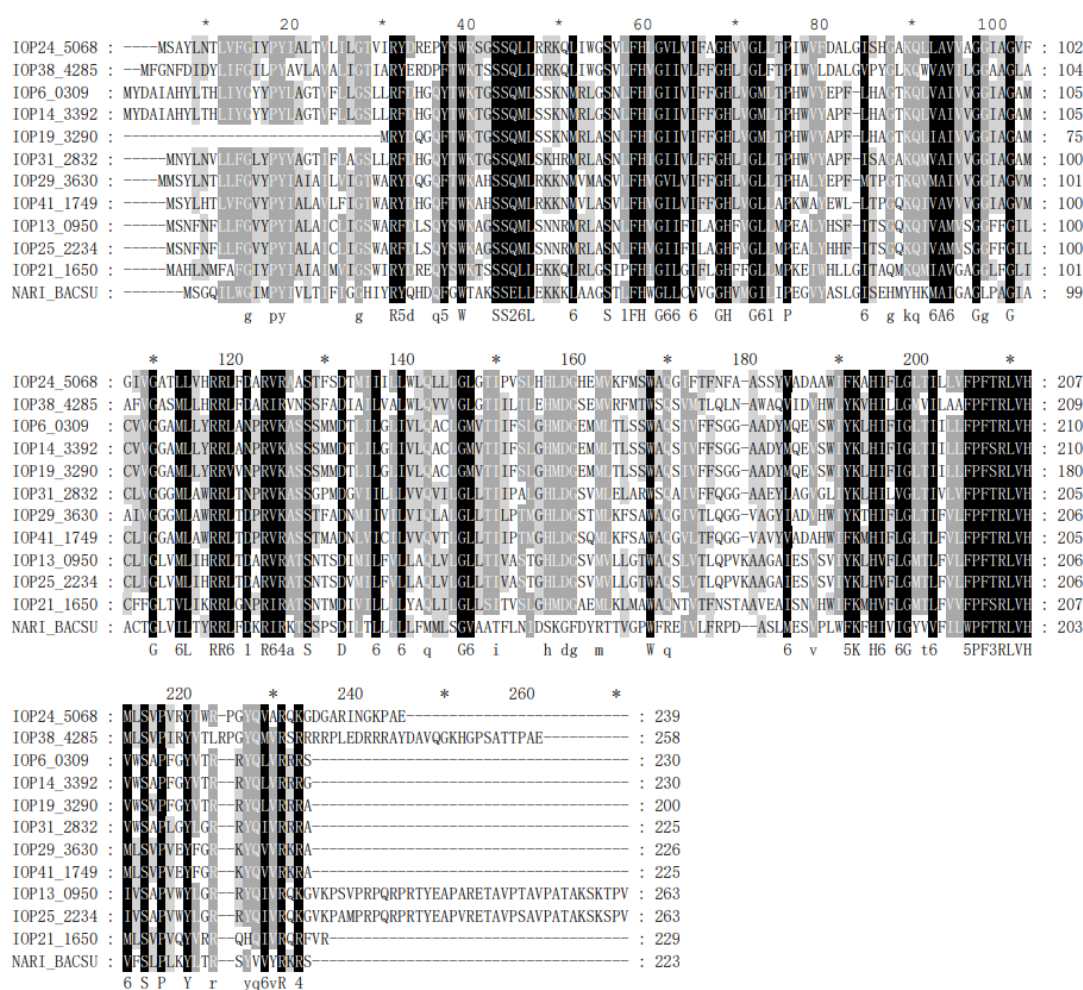

**Figure S7.** Sequence alignment of Nar I proteins in the isolates and Nar I (Respiratory nitrate reductase 1 gamma chain) identified from *Bacillus subtilis*. Species: IOP\_24 (IOP24\_5068), IOP\_38 (IOP28\_4285), IOP\_6 (IOP6\_0309), IOP\_14 (IOP14\_3392), IOP\_19 (IOP19\_3290), IOP\_31 (IOP31\_2832), IOP\_29 (IOP29\_3630), IOP\_41 (IOP41\_1749), IOP\_13 (IOP13\_0950), IOP\_25 (IOP25\_2234), IOP\_21 (IOP21\_1650), *Bacillus subtilis* K12 (NARI\_ECOLI, accession: P11350). Strictly conserved residues are marked with black background.

### Supplementary Tables

**Table S1.** Average Nucleotide Identity (ANI) and Average Amino acid Identity (AAI) between the genomes of isolates and their relatives.

| Strain | Reference genomes compared                | ANI     | AAI    |
|--------|-------------------------------------------|---------|--------|
| IOP_1  | <i>Thalassospira xiamenensis</i> M-5      | 100.00% | 99.94% |
| IOP_2  | <i>Agromyces soli</i> KACC 16215          | 92.79%  | 94.66% |
| IOP_6  | <i>Halomonas zindurans</i> B6             | 76.90%  | 65.88% |
| IOP_12 | <i>Qipengyuania citrea</i> CGMCC 1.8703   | 98.09%  | 98.19% |
| IOP_13 | <i>Pseudomonas kunmingensis</i> HL22-2    | 97.00%  | 97.29% |
| IOP_14 | <i>Halomonas titanicae</i> BH1            | 97.57%  | 97.58% |
| IOP_16 | <i>Salipiger marinus</i> DSM 26424        | 98.24%  | 98.06% |
| IOP_19 | <i>Halomonas meridiana</i> DSM 5425       | 97.28%  | 96.60% |
| IOP_21 | <i>Rheinheimera pleomorphica</i> PKS7     | 79.91%  | 81.32% |
| IOP_23 | <i>Seohaecicola saemankumensis</i> DP4N-5 | 76.50%  | 65.89% |
| IOP_24 | <i>Martellella mediterranea</i> DSM 17316 | 93.63%  | 93.88% |
| IOP_25 | <i>Pseudomonas stutzeri</i> ATCC 14405    | 86.07%  | 90.15% |

|        |                                           |         |        |
|--------|-------------------------------------------|---------|--------|
| IOP_28 | <i>Citromicrobium bathyomarinum</i> JL354 | 100.00% | 99.95% |
| IOP_29 | <i>Marinobacter adhaerens</i> HP15        | 87.62%  | 93.52% |
| IOP_31 | <i>Halomonas hydrothermalis</i> Slthf2    | 77.08%  | 65.90% |
| IOP_38 | <i>Aurantimonas coralicida</i> DSM 14790  | 96.30%  | 97.31% |
| IOP_41 | <i>Marinobacter shengliensis</i> LZ-6     | 96.04%  | 96.31% |

Table S2. Genomic characteristics of isolates.

| Strain | Genome size (bp) | Contigs | G+C content (mol%) | L50 | N50     | Completeness | Contamination |
|--------|------------------|---------|--------------------|-----|---------|--------------|---------------|
| IOP_1  | 4808071          | 24      | 54.8               | 4   | 434721  | 100          | 0.00          |
| IOP_2  | 3872332          | 5       | 72.2               | 1   | 1975501 | 99.33        | 0.67          |
| IOP_6  | 3989131          | 26      | 52.6               | 4   | 478224  | 99.43        | 0.95          |
| IOP_12 | 3247055          | 19      | 63.9               | 3   | 535616  | 99.48        | 0.42          |
| IOP_13 | 4998573          | 159     | 62.1               | 6   | 282269  | 100          | 0.14          |
| IOP_14 | 5280855          | 63      | 54.7               | 9   | 171700  | 99.57        | 0.89          |
| IOP_16 | 5034081          | 72      | 66.6               | 6   | 292303  | 99.10        | 1.53          |
| IOP_19 | 3688912          | 234     | 56.8               | 10  | 90895   | 100          | 0.44          |
| IOP_21 | 4301081          | 14      | 49.5               | 2   | 673391  | 100          | 0.22          |
| IOP_23 | 4115415          | 44      | 60                 | 5   | 329396  | 98.69        | 0.28          |
| IOP_24 | 5424777          | 69      | 62.2               | 12  | 131375  | 99.03        | 0.32          |
| IOP_25 | 4545959          | 41      | 63.6               | 4   | 430176  | 100          | 0.14          |
| IOP_28 | 3213860          | 3       | 65                 | 1   | 2874297 | 99.93        | 0.00          |
| IOP_29 | 4478111          | 12      | 57.1               | 2   | 796908  | 100          | 0.00          |
| IOP_31 | 3688243          | 89      | 64.2               | 13  | 95977   | 99.07        | 0.11          |
| IOP_38 | 4734847          | 62      | 66.6               | 4   | 448666  | 100          | 0.00          |
| IOP_41 | 4305604          | 84      | 57.1               | 9   | 151162  | 100          | 0.05          |
